# Supplementary material for: Cardiovascular Risk Is Elevated in Lean Subjects with Nonalcoholic Fatty Liver Disease
Source: PubMed Central journal article supplement — Gut Liver. 2021 Jul 12;16(2):290–9. doi: 10.5009/gnl210084 (PMC8924809; doi:10.5009/gnl210084), 2021-07-12
Supplement: gnl-16-2-290-supple.pdf [file gnl-16-2-290-supple.pdf]

**Supplementary Table 1.** Definitions of the Risk Models for NAFLD and Liver Fibrosis

| Model                                | Cutoff points | Equation                                                                                                                                                                                                                                                                                                                                                                                                                                                                                                                                                                                                                                                                                                                                                                 |
|--------------------------------------|---------------|--------------------------------------------------------------------------------------------------------------------------------------------------------------------------------------------------------------------------------------------------------------------------------------------------------------------------------------------------------------------------------------------------------------------------------------------------------------------------------------------------------------------------------------------------------------------------------------------------------------------------------------------------------------------------------------------------------------------------------------------------------------------------|
| Risk models for NAFLD                |               |                                                                                                                                                                                                                                                                                                                                                                                                                                                                                                                                                                                                                                                                                                                                                                          |
| Comprehensive NAFLD score            | ≥40           | Probability (in %) of having NAFLD= $1/(1+\exp(-x))\times 100$ .<br>If male,<br>$x=0.016\times\text{age}+0.182\times\text{BMI}+0.089\times\text{WC}+0.391\times\text{alcohol}+0.124\times\text{exercise}+0.018\times\text{fasting glucose}+0.773\times\log_e(\text{triglycerides})-0.014\times\text{HDL cholesterol}+0.145\times\text{uric acid}-0.674\times\log_e(\text{AST})+1.632\times\log_e(\text{ALT})-21.695$ .<br>If female,<br>$x=0.320\times\text{BMI}+0.044\times\text{WC}+0.533\times\text{diabetes (yes=1, no=0)}+0.016\times\text{fasting glucose}+0.951\times\log_e(\text{triglycerides})-0.015\times\text{HDL cholesterol}+0.199\times\text{uric acid}-0.645\times\log_e(\text{AST})+1.302\times\log_e(\text{ALT})+0.255\times\text{menopause}-19.741$ . |
| NAFLD liver fat score                | ≥-0.640       | $-2.89+1.18\times\text{metabolic syndrome (yes=1, no=0)}+0.45\times\text{diabetes (yes=2, no=0)}+0.15\times\text{fasting insulin}+0.04\times\text{AST}-0.94\times\text{AST/ALT ratio}$                                                                                                                                                                                                                                                                                                                                                                                                                                                                                                                                                                                   |
| Risk models for significant fibrosis |               |                                                                                                                                                                                                                                                                                                                                                                                                                                                                                                                                                                                                                                                                                                                                                                          |
| NAFLD fibrosis score                 | ≥0.676        | $-1.675+0.037\times\text{age}+0.094\times\text{BMI}+1.13\times\text{IFG/diabetes (yes=1, no=0)}+0.99\times\text{AST/ALT ratio}-0.013\times\text{platelet count}-0.66\times\text{albumin}$                                                                                                                                                                                                                                                                                                                                                                                                                                                                                                                                                                                |
| BARD score                           | ≥2.0          | AST/ALT ratio ≥0.8: 2 points; BMI ≥28 kg/m <sup>2</sup> : 1 point; the presence of diabetes: 1 point                                                                                                                                                                                                                                                                                                                                                                                                                                                                                                                                                                                                                                                                     |

NAFLD, nonalcoholic fatty liver disease; BMI, body mass index; WC, waist circumference; HDL, high-density lipoprotein; AST, aspartate aminotransferase; ALT, alanine transaminase; IFG, impaired fasting glucose.

**Supplementary Table 2.** High Probability of ASCVD According to Cardiometabolic Risk Factors Stratified by Obesity and NAFLD Status Based on the Liver Fat Score

| Variable                  | Subjects without NAFLD OR (95% CI) | Obese subjects with NAFLD |         | Lean subjects with NAFLD |         |
|---------------------------|------------------------------------|---------------------------|---------|--------------------------|---------|
|                           |                                    | OR (95% CI)               | p-value | OR (95% CI)              | p-value |
| Hypertension              | 1.00 (reference)                   | 4.80 (4.07–5.66)          | <0.001  | 3.75 (3.12–4.51)         | <0.001  |
| Diabetes mellitus         | 1.00 (reference)                   | 13.14 (10.63–16.81)       | <0.001  | 15.06 (11.63–19.49)      | <0.001  |
| Chronic kidney disease    | 1.00 (reference)                   | 1.68 (1.21–2.33)          | 0.002   | 1.55 (1.09–2.19)         | 0.014   |
| Hyper-LDL cholesterolemia | 1.00 (reference)                   | 2.38 (2.03–2.78)          | <0.001  | 2.02 (1.69–2.41)         | <0.001  |
| Hypo-HDL cholesterolemia  | 1.00 (reference)                   | 3.85 (3.27–4.53)          | <0.001  | 3.99 (3.30–4.53)         | <0.001  |
| Hypertriglyceridemia      | 1.00 (reference)                   | 8.25 (7.01–7.90)          | <0.001  | 7.49 (6.23–9.00)         | <0.001  |
| Proteinuria               | 1.00 (reference)                   | 3.24 (1.98–5.30)          | <0.001  | 2.15 (1.17–3.94)         | 0.014   |

ASCVD, atherosclerotic cardiovascular disease; NAFLD, nonalcoholic fatty liver disease; OR, odds ratio; CI, confidence interval; LDL, low-density lipoprotein; HDL, high-density lipoprotein.

Adjusted for age and sex.

**Supplementary Table 3.** High Probability of ASCVD According to Obesity and NAFLD Based on the Liver Fat Score

| Model   | Subjects without NAFLD OR (95% CI) | Obese subjects with NAFLD |         | Lean subjects with NAFLD |         |
|---------|------------------------------------|---------------------------|---------|--------------------------|---------|
|         |                                    | OR (95% CI)               | p-value | OR (95% CI)              | p-value |
| Crude   | 1.00 (reference)                   | 2.27 (1.95–2.64)          | <0.001  | 3.02 (2.54–3.58)         | <0.001  |
| Model 1 | 1.00 (reference)                   | 5.97 (4.54–7.84)          | <0.001  | 4.98 (2.69–6.70)         | <0.001  |
| Model 2 | 1.00 (reference)                   | 2.22 (1.39–3.53)          | 0.001   | 2.03 (1.29–3.20)         | 0.002   |

ASCVD, atherosclerotic cardiovascular disease; NAFLD, nonalcoholic fatty liver disease; OR, odds ratio; CI, confidence interval.

Model 1: adjusted for age and sex and model 2: adjusted for age, sex, smoking, exercise, waist circumference, hypertension, diabetes, homeostasis model assessment of insulin resistance, chronic kidney disease, and hyper-low-density lipoprotein cholesterolemia.

**Supplementary Table 4.** High Probability of ASCVD According to Obesity and Significant Fibrosis Based on the BARD Score

| Model   | NAFLD with no fibrosis<br>OR (95% CI) | Obese NAFLD subjects with significant fibrosis |         | Lean NAFLD subjects with significant fibrosis |         |
|---------|---------------------------------------|------------------------------------------------|---------|-----------------------------------------------|---------|
|         |                                       | OR (95% CI)                                    | p-value | OR (95% CI)                                   | p-value |
| Crude   | 1.00 (reference)                      | 1.58 (1.25–1.99)                               | <0.001  | 3.01 (2.26–4.00)                              | <0.001  |
| Model 1 | 1.00 (reference)                      | 1.15 (0.93–1.60)                               | 0.398   | 1.57 (1.06–2.32)                              | 0.026   |
| Model 2 | 1.00 (reference)                      | 1.31 (0.86–2.00)                               | 0.213   | 1.65 (0.98–2.78)                              | 0.058   |

ASCVD, atherosclerotic cardiovascular disease; NAFLD, nonalcoholic fatty liver disease; OR, odds ratio; CI, confidence interval.

Model 1: adjusted for age and sex and model 2: adjusted for age, sex, smoking, exercise, waist circumference, hypertension, diabetes, homeostasis model assessment of insulin resistance, chronic kidney disease, and hyper-low-density lipoprotein cholesterolemia.

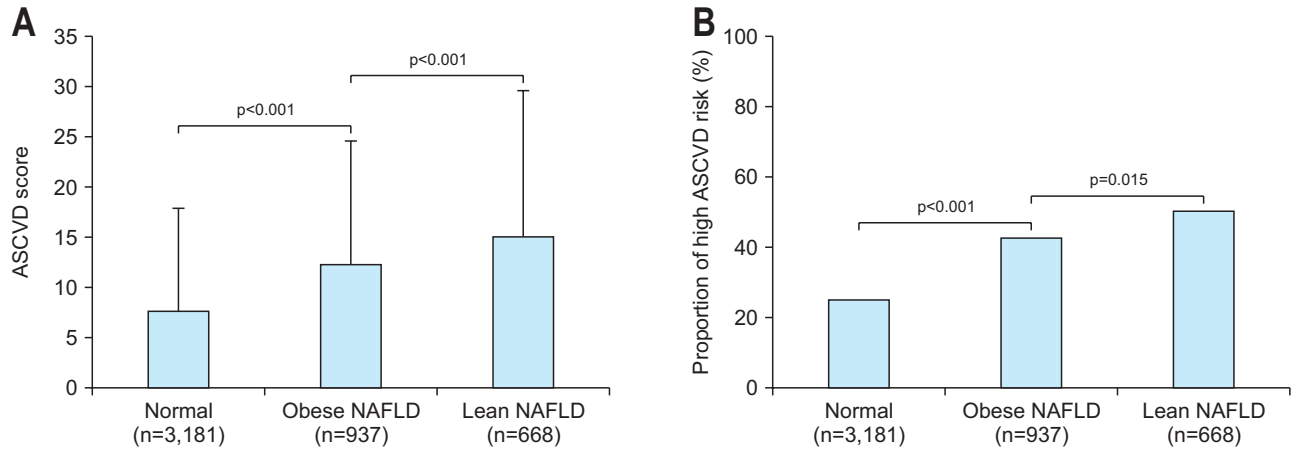

**Supplementary Fig. 1.** ASCVD score and proportion of high ASCVD risk according to LFS-defined NAFLD/obesity status. Lean NAFLD subjects had significantly higher ASCVD scores (A) and prevalence of a high ASCVD risk (B), followed by subjects with obese NAFLD and those without NAFLD (all  $p < 0.05$ ).

ASCVD, atherosclerotic cardiovascular disease; NAFLD, nonalcoholic fatty liver disease; LFS, liver fat score.

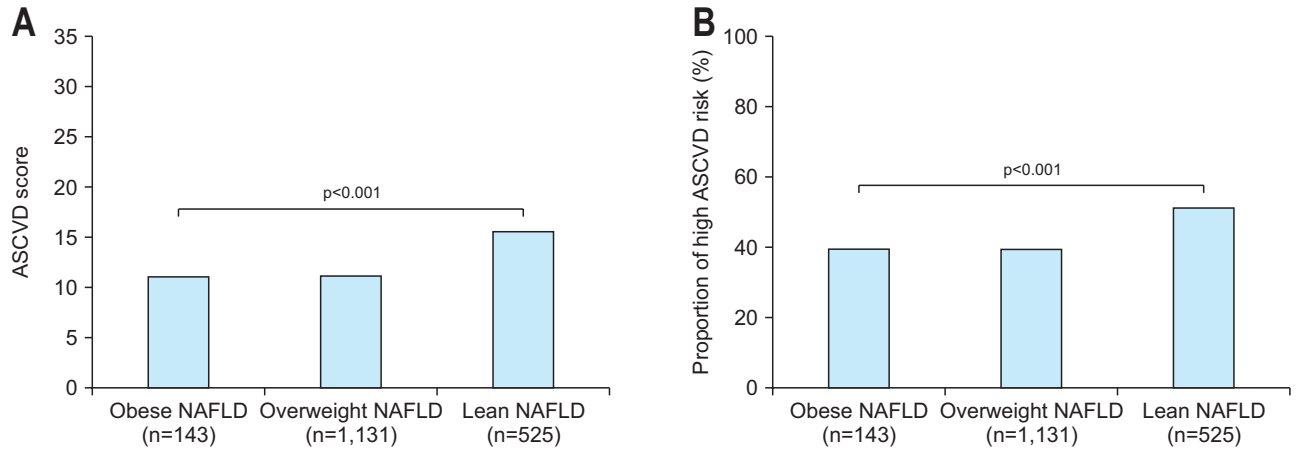

**Supplementary Fig. 2.** ASCVD score and proportion of high ASCVD risk according to CNS-defined NAFLD/obesity status (BMI  $\geq 30$  kg/m<sup>2</sup>). Lean NAFLD subjects had significantly higher ASCVD scores (A) and prevalence of a high ASCVD risk (B) than obese subjects (all  $p < 0.001$ ). ASCVD, atherosclerotic cardiovascular disease; NAFLD, nonalcoholic fatty liver disease; CNS, comprehensive NAFLD score; BMI, body mass index.

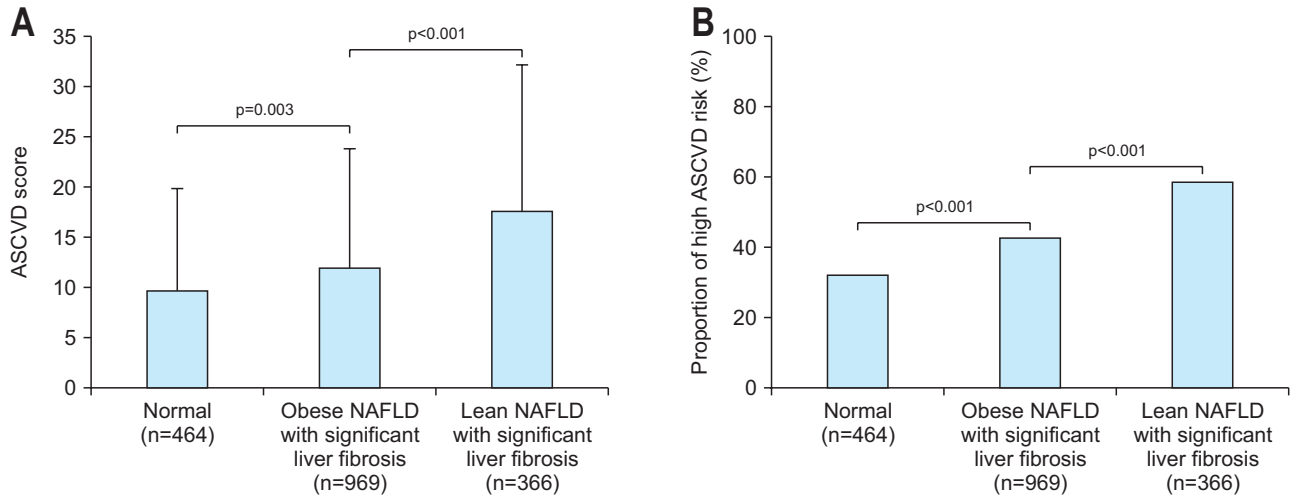

**Supplementary Fig. 3.** ASCVD score and proportion of high ASCVD risk according to BARD-defined significant liver fibrosis stratified by CNS-defined NAFLD/obesity status. Lean subjects with BARD-defined significant liver fibrosis had significantly higher ASCVD scores (A) and prevalence of a high ASCVD risk (B), followed by obese subjects with BARD-defined significant liver fibrosis and those without BARD-defined significant liver fibrosis (all  $p < 0.05$ ).

ASCVD, atherosclerotic cardiovascular disease; NAFLD, nonalcoholic fatty liver disease; CNS, comprehensive NAFLD score.
